# Supplementary material for: LptM promotes oxidative maturation of the lipopolysaccharide translocon by substrate binding mimicry
Source: PubMed Central journal article supplement (PMC10567701; doi:10.1038/s41467-023-42007-w), 2023-10-11
Supplement: 41467_2023_42007_MOESM3_ESM.pdf [file 41467_2023_42007_MOESM3_ESM.pdf]

**Title: Supplementary Data 1.**

**Description:** Protein C-alpha RMSD. Protein C-alpha root mean square deviations (RMSDs) for the LptDE and LptDEM complexes over 3 x 500 ns simulations. In all cases the RMSDs converge to ca. 0.3 nm, suggesting that the input models are stable.

**Title: Supplementary Data 2.**

**Description:** LptD Deuteration kinetics.

Relative deuterium uptake plot as a function of deuterium exposure time for each peptide of LptD in LptDE (red line) and LptDEM (blue line). Maximally deuterated control is represented in triplicate at t = 30 min (in some cases for, e.g. peptide [494-499], the uptake of the control overlays with the 30 min timepoint).

**Title: Supplementary Data 3.**

**Description:** LptE Deuteration kinetics.

Relative deuterium uptake plot as a function of deuterium exposure time for each peptide of LptE in LptDE (red line) and LptDEM (blue line). Maximally deuterated control is represented in triplicate at t = 30 min (in some cases for, e.g. peptide [123-132], the uptake of the control overlays with the 30 min time point).

**Title: Supplementary Data 4.**

**Description:** List of protein sequences similar to LptM in proteobacteria

**Title: Supplementary Data 5.**

**Description:** List of protein sequences similar to LptM in non-proteobacteria

**Title: Supplementary Data 6.**

**Description:** List of protein sequences similar to LptM in *Enterobacteriaceae*
