# Supplementary material for: LptM promotes oxidative maturation of the lipopolysaccharide translocon by substrate binding mimicry
Source: PubMed Central journal article supplement (PMC10567701; doi:10.1038/s41467-023-42007-w), 2023-10-11

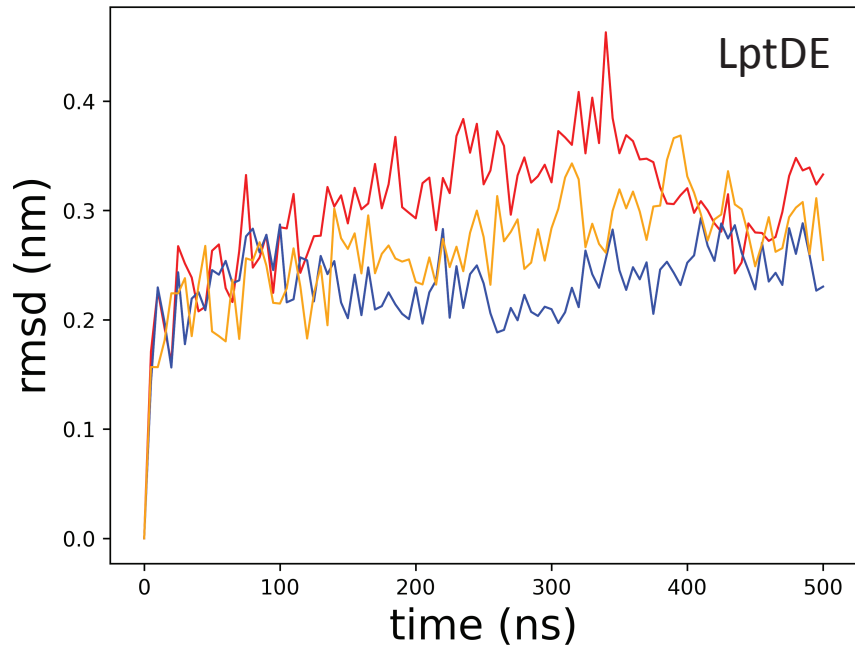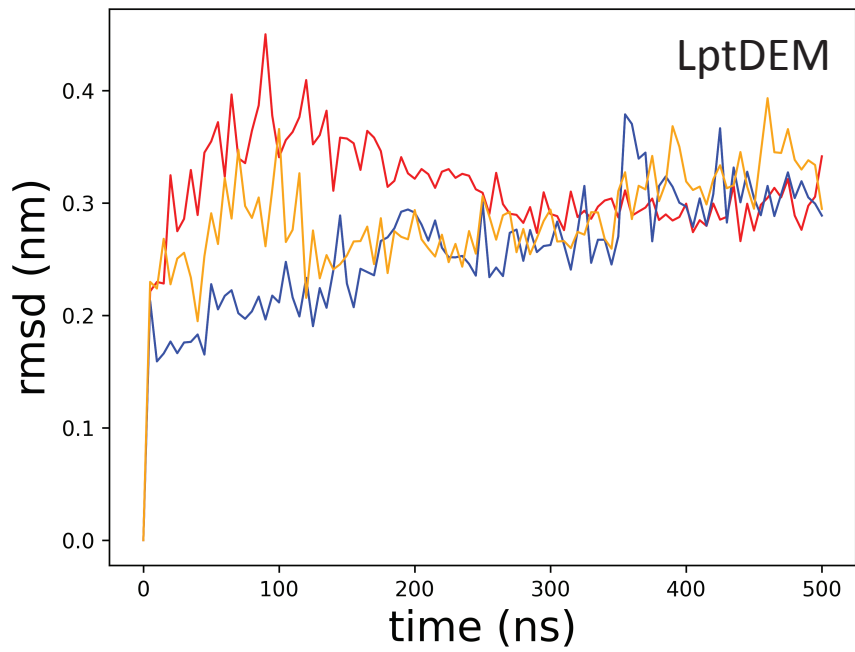

Supplement: 41467_2023_42007_MOESM4_ESM.pdf [file 41467_2023_42007_MOESM4_ESM.pdf]
